# Supplementary material for: Protocol investigating the clinical utility of an objective measure of activity and attention (QbTest) on diagnostic and treatment decision-making in children and young people with ADHD—‘ A ssessing Q bTest U tility in A DHD’ (AQUA): a randomised controlled trial
Source: HighWire-hosted journal article supplement (doi:10.1136/bmjopen-2014-006838), 2014-12-01
Supplement: bmjopen-2014-006838supp2.pdf [file bmjopen-2014-006838supp2.pdf]

**Appendix B - CONSENT FORM FOR YOUNG PEOPLE  
(Final version 1.2: 05.06.2014)**

**Title of Study: Assessing QbTest Utility in ADHD: A Randomised Controlled Trial**

**REC ref: 14/WM/0166**

**Name of Researcher:**

**Name of Participant (young person):**

**Name of Participant (parent):** **Please INITIAL box**

1. I confirm that I have read and understand the information sheet version number 1.2 dated 05.06.2014 for the above study and have had the opportunity to ask questions.
  
2. I understand that my participation is voluntary and that I am free to withdraw at any time, without giving any reason, and without their medical care or legal rights being affected. I understand that should they withdraw then the information collected so far cannot be erased and that this information may still be used in the project analysis.
  
3. I understand that relevant sections of my medical notes and data collected in the study may be looked at by authorised individuals from the University of Nottingham, the research group and regulatory authorities where it is relevant to our taking part in this study. I give permission for these individuals to have access to these records and to collect, store, analyse and publish information obtained from my child's participation in this study. I understand that my child's personal details will be kept confidential.
  
4. I agree for my teacher and head teacher to be contacted and be asked to complete questionnaires about my behaviour at school.
  
5. I understand if I/ take part in any research interviews, they will be recorded and that anonymous direct quotes from the focus group may be used in the study reports.
  
6. I agree to take part in the above study.

\_\_\_\_\_  
Name of young person

\_\_\_\_\_  
Date

\_\_\_\_\_  
Signature

To be completed by researcher/investigator taking consent:

\_\_\_\_\_  
Name of researcher

\_\_\_\_\_  
Date

\_\_\_\_\_  
Signature
